# Supplementary material for: Student Perceptions of Online Education during COVID-19 Lockdowns: Direct and Indirect Effects on Learning
Source: MDPI journal article supplement (doi:10.3390/educsci12110813), 2022-11-15
Supplement: s1 [file s1]

## Supplementary materials

**Table S1.** Open-ended questions used in the surveys.

| Open-ended questions                                                                                                                                 | Responses |
|------------------------------------------------------------------------------------------------------------------------------------------------------|-----------|
| *Please explain how you think the role of studying has changed in your life since the COVID-19 outbreak.                                             | 338       |
| *Please explain how you think your relationship with the university has changed. <sup>1</sup>                                                        | 264       |
| Please explain how your education has been affected by increased caring responsibilities during the COVID-19 pandemic. <sup>2</sup>                  | 97        |
| Which of the teaching and learning changes do you feel has been the most successful and why?                                                         | 358       |
| Which of the teaching and learning changes do you feel has been the least successful and why?                                                        | 345       |
| From your perspective have there been any positives aspects to the lockdown for your study experience?                                               | 374       |
| From your perspective have there been any challenging aspects to the lockdown for your study experience?                                             | 389       |
| For the online learning activities which have been made available to you, please identify the main barriers to your participation in the activities. | 358       |
| Please explain how your employment options have changed since the pandemic and how these changes might have an impact on your finances. <sup>3</sup> | 172       |

\* These two questions were only included in the first survey. Three open ended questions were only presented to a subset of respondents; <sup>1</sup>who affirmed that their relationship with the university had changed since the switch to online learning / remote studying (N = 279), <sup>2</sup>who felt that they had experienced an increase in caring responsibilities and these had a negative impact on their learning and education (N = 105), <sup>3</sup>who reported a change in their employment options since the start of the pandemic (N = 199).

**Table S2.** Interview schedule.

| Topic                | Questions                                                                                                                                                                                                                                                                                                                                                                                                                                                                                                                                                                                                                                                                                                                                                                                                                                                                                                                                                                                                               |
|----------------------|-------------------------------------------------------------------------------------------------------------------------------------------------------------------------------------------------------------------------------------------------------------------------------------------------------------------------------------------------------------------------------------------------------------------------------------------------------------------------------------------------------------------------------------------------------------------------------------------------------------------------------------------------------------------------------------------------------------------------------------------------------------------------------------------------------------------------------------------------------------------------------------------------------------------------------------------------------------------------------------------------------------------------|
| Learning environment | <p>What has your experience been like studying during the lockdown?</p> <p>Can you tell me a bit more about the space, or spaces, you have been studying in?</p> <p>Do you think that lockdown has affected your ability to study, either positively or negatively?</p> <p>Do you feel that you had enough time to study?</p> <p>What aspects of the environment in which you are studying have been helpful? What has been more challenging?</p>                                                                                                                                                                                                                                                                                                                                                                                                                                                                                                                                                                       |
| Learning experience  | <p>Thinking about the steps that your department and the university has taken around moving teaching online, what has been helpful?</p> <p>Do you think that there are things that relate to your Department and University's actions or decisions that have made your learning more challenging?</p> <p>How have you found using technology to engage with your learning? Any specific challenges or advantages?</p> <p>Have you developed any new skills in the switch to online learning? What resources have you used to develop these new skills? Is this something the university directed you to or something that you found by yourself? Would you be interested in developing these skills further in the future?</p> <p>Can you tell me about any elements from the switch to online learning that you would like to see continue after the pandemic?</p> <p>From the experience of online teaching that you did have, would you make any changes to your learning approaches to make the most out of it?</p> |
| Support              | <p>Do you think that lockdown has affected your wellbeing? Can you tell me why this is?</p> <p>How well do you feel King's has supported you? How has the level of support been like in comparison to your experience until now?</p> <p>Have you had support from your tutors? Your department?</p> <p>What kind of interaction have you had with other students? What has been helpful and unhelpful about this?</p>                                                                                                                                                                                                                                                                                                                                                                                                                                                                                                                                                                                                   |
| Future plans         | <p>Have your plans for the future changed?</p>                                                                                                                                                                                                                                                                                                                                                                                                                                                                                                                                                                                                                                                                                                                                                                                                                                                                                                                                                                          |
| End                  | <p>Is there anything else you would like to say that we have not covered?</p>                                                                                                                                                                                                                                                                                                                                                                                                                                                                                                                                                                                                                                                                                                                                                                                                                                                                                                                                           |
